# Supplementary material
Source: PubMed Central journal article supplement (PMC4047672)
Supplement: NIHMS582295-supplement-01.pdf [file NIHMS582295-supplement-01.pdf]

## Tissue-engineered cartilage with inducible and tunable immunomodulatory properties

Katherine A. Glass, Jarrett M. Link, Jonathan M. Brunger, Franklin T. Moutos, Charles A. Gersbach\*, Farshid Guilak\*

\*These authors contributed equally.

### Supplementary Information:

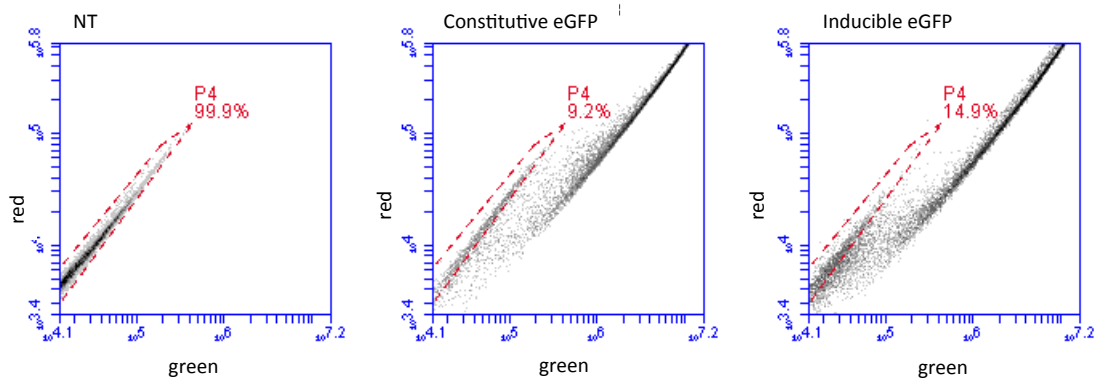

**Figure S1.** Gating was performed on MSCs isolated from non-transduced (NT) constructs. Representative images of MSCs isolated from constitutive or inducible eGFP-expressing constructs are also shown. All cells outside the NT gate are counted as eGFP+.

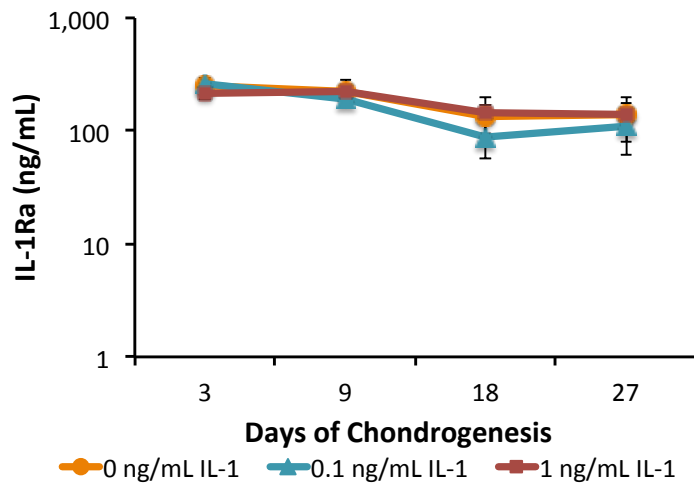

**Figure S2.** IL-1Ra secretion from IL-1Ra-expressing constructs into culture media over 72 hours during chondrogenesis with either 0, 0.1, or 1 ng/mL IL-1 treatment (mean  $\pm$  SEM, n=3), measured on days 3, 9, 18, and 27.

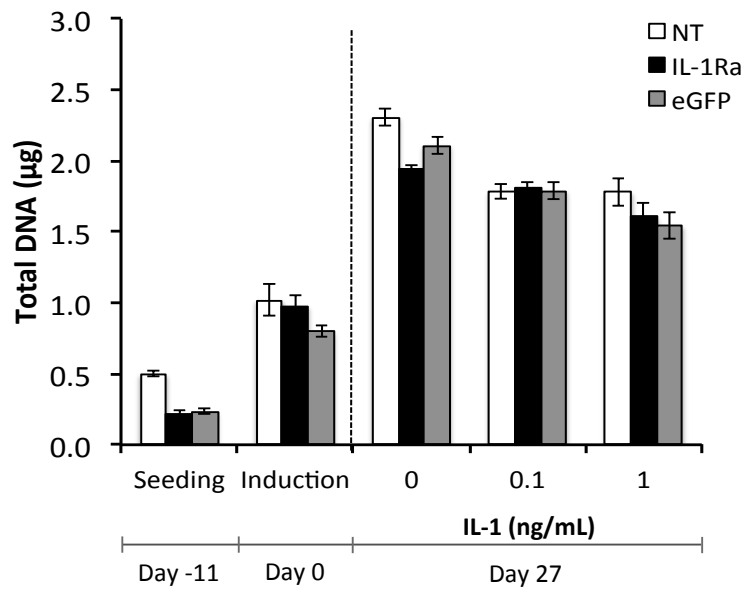

**Figure S3.** DNA content in engineered cartilage constructs at seeding, chondrogenic induction, and after 27 days of culture in chondrogenic media with either 0, 0.1, or 1 ng/mL IL-1 (mean  $\pm$  SEM, n=5). NT indicates non-transduced constructs. IL-1Ra indicates constructs transduced with IL-1Ra LV. eGFP indicates constructs transduced with eGFP LV. There was a significant main effect of vector and media condition but no significant interaction term by ANOVA.

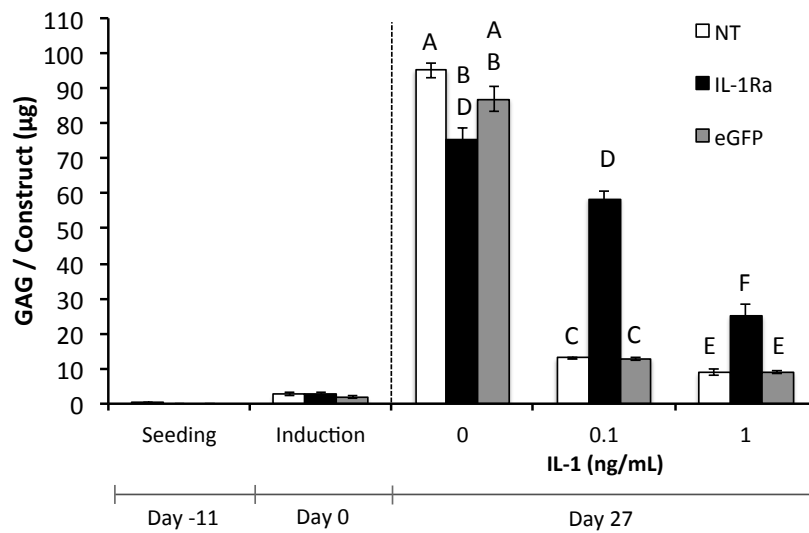

**Figure S4.** GAG content in engineered cartilage constructs at seeding, chondrogenic induction, and after 27 days of culture in chondrogenic media with either 0, 0.1, or 1 ng/mL IL-1 (mean  $\pm$  SEM, n=5). NT indicates non-transduced constructs. IL-1Ra indicates constructs transduced with IL-1Ra LV. eGFP indicates constructs transduced with eGFP LV. Groups with different letters are significantly different ( $P < 0.05$ ) by ANOVA and Fisher's LSD post-hoc.

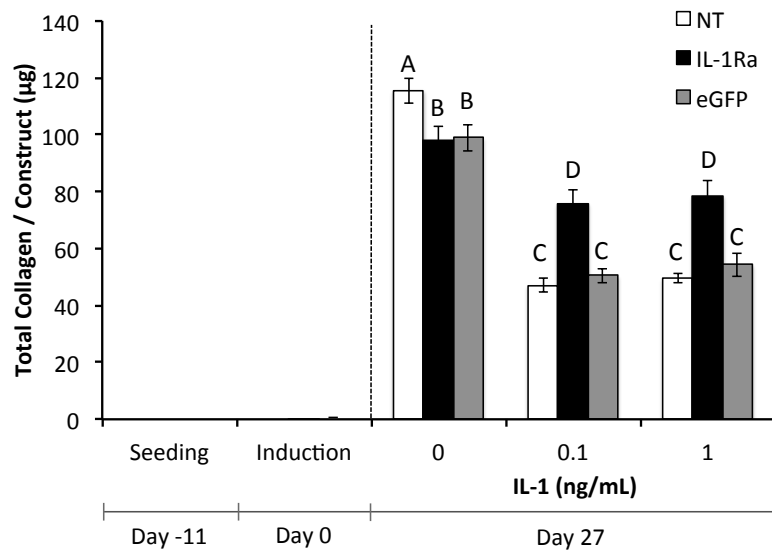

**Figure S5.** Total collagen content in engineered cartilage constructs at seeding, chondrogenic induction, and after 27 days of culture in chondrogenic media with either 0, 0.1, or 1 ng/mL IL-1 (mean  $\pm$  SEM, n=5). NT indicates non-transduced constructs. IL-1Ra indicates constructs transduced with IL-1Ra LV. eGFP indicates constructs transduced with eGFP LV. Groups with different letters are significantly different ( $P < 0.05$ ) by ANOVA and Fisher's LSD post-hoc.
